# Supplementary material for: Hollow nanoreactors for Pd-catalyzed Suzuki–Miyaura coupling and O-propargyl cleavage reactions in bio-relevant aqueous media
Source: Royal Society of Chemistry journal article supplement (doi:10.1039/c8sc04390f), 2018-12-26

# Quest for biocompatible nanoreactors reaches a new milestone

Palladium (Pd) metal nanoparticles (NP) are good catalysts that can mimic enzyme activity in living systems...

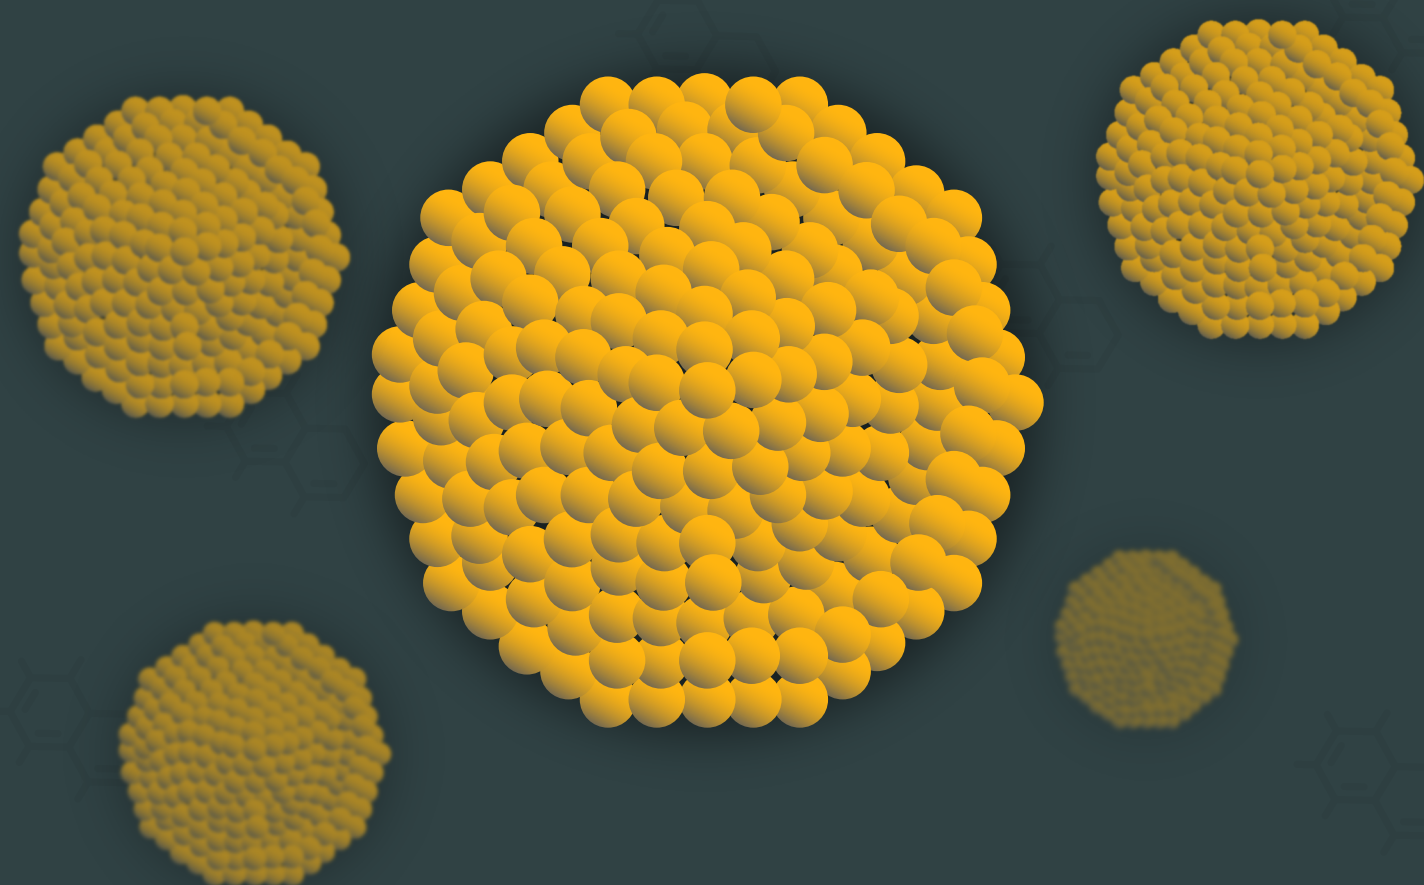

but most nanocatalysts only work in organic solvents, and become aggregated and deactivated in aqueous solvents.

Encapsulating Pd NP could overcome these limitations

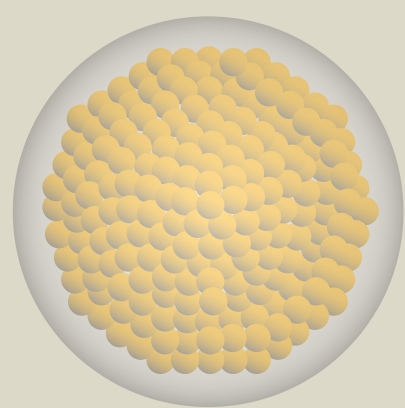

## Synthesis of hollow spheres with Pd-NP at their inner cavity

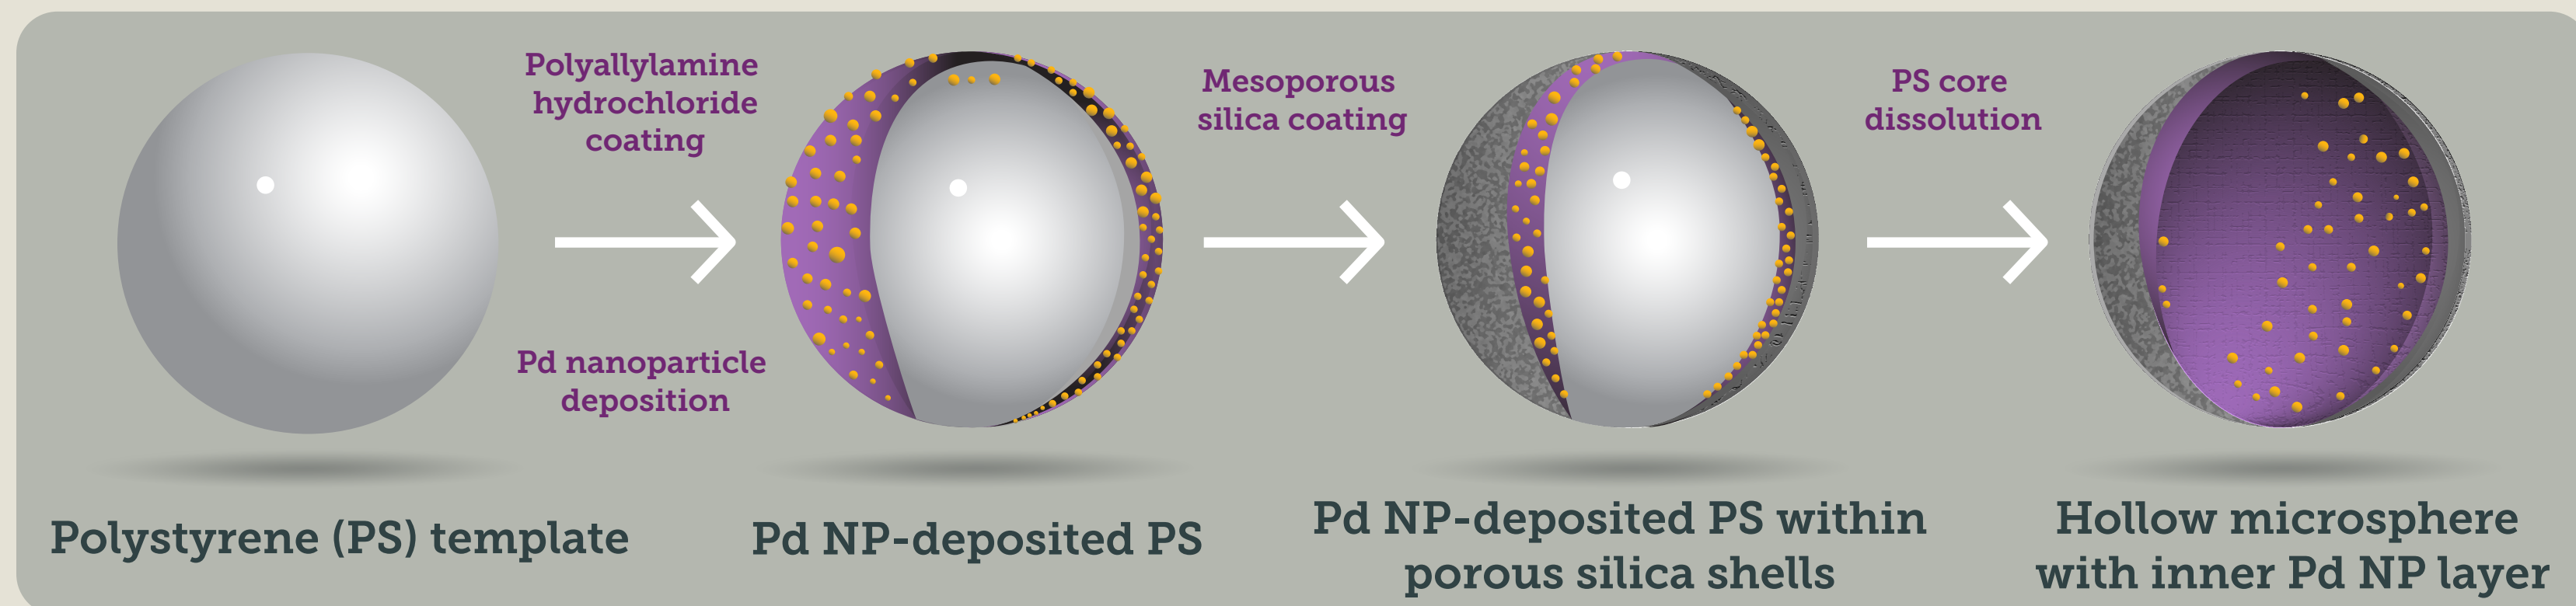

## How are hollow-shelled Pd nanoreactors better than free NP?

Biocompatible

Low biotoxicity

Stable at 37 °C

Prevents entry of biomolecules and leakage of Pd

Stable in aqueous solutions

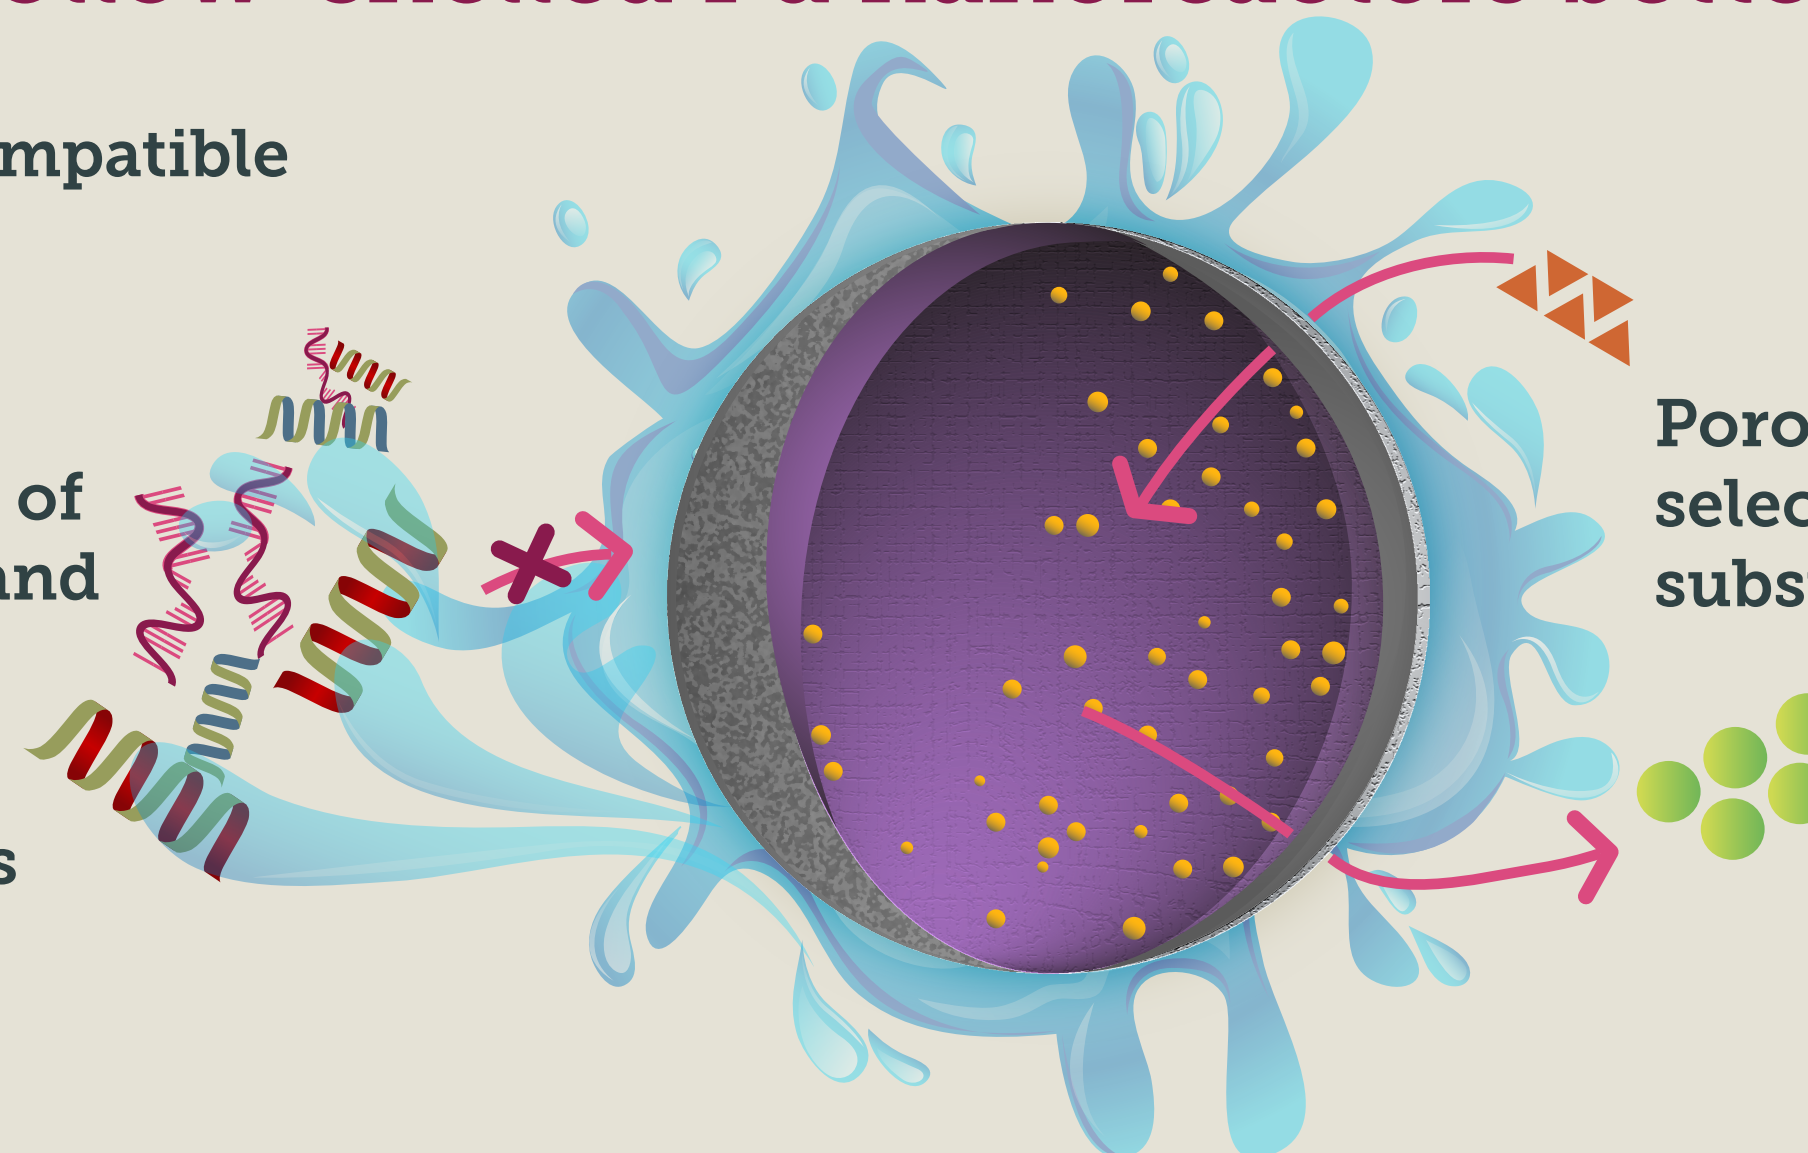

Porous surface enables selective passage of substrates and products

Easy recovery by centrifugation

**Novel biocompatible hollow-shelled Pd nanoreactors can be used for delivery of targeted therapies**

Chemical  
Science

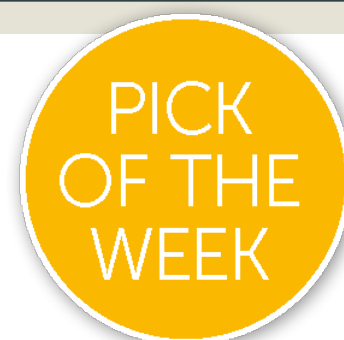

Hollow nanoreactors for Pd-catalyzed Suzuki–Miyaura couplings and O-propargyl cleavage reactions in bio-relevant aqueous media

López, Correa-Duarte, Mascareñas *et al.* (2019)

DOI: 10.1039/c8sc04390f

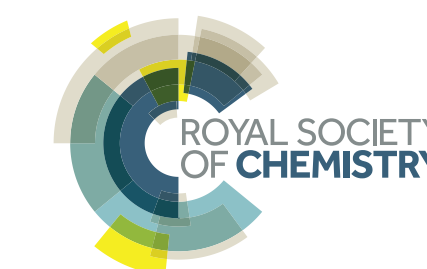

Supplement: c8sc04390f2.pdf [file c8sc04390f2.pdf]
